# Supplementary material
Source: HighWire-hosted journal article supplement (http://www.cmaj.ca/highwire/filestream/60105/field_highwire_adjunct_files/5/161119-res-6-at.pdf)

**Appendix 6 (as supplied by the authors):** Average annual hospital admissions between 2003 and 2015 in British Columbia, by year of birth. We found no significant discontinuity at the change in the public drug plan deductible at 1939 (estimate 0.001, 95%CI: -0.005 to 0.029, relative increase of 1.92%).

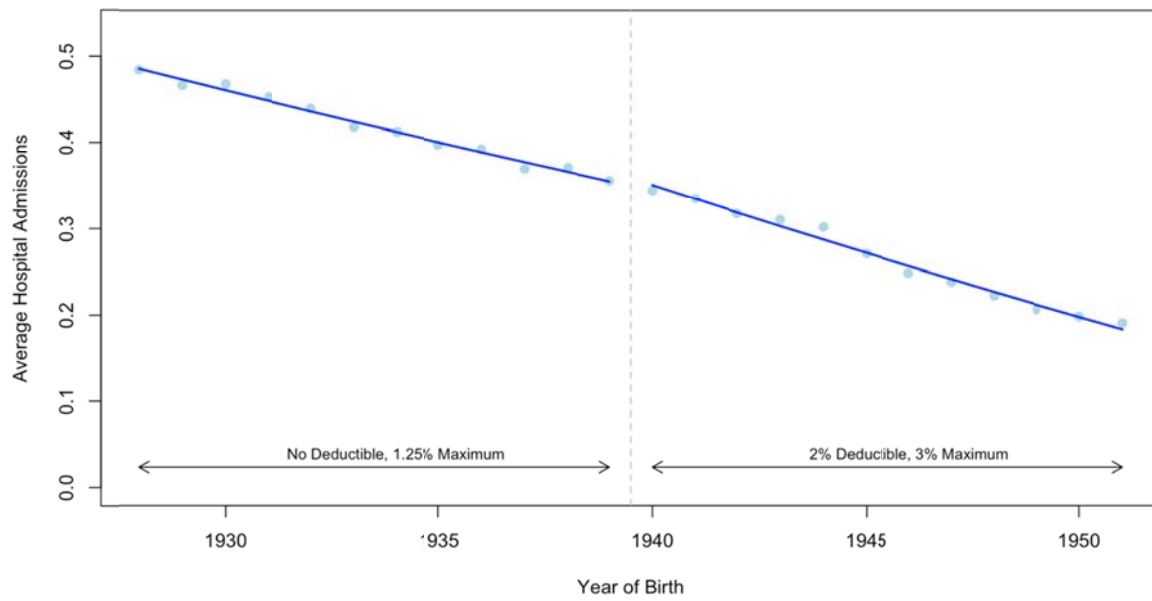

Supplement: 161119-res-6-at.pdf [file 161119-res-6-at.pdf]
